# Supplementary material
Source: Springer Nature journal article supplement (https://www.springermedizin.de/resource/supplementary/13023_2009_178_MOESM3_ESM.pdf/9641798)

# Incidence Rates per 100,000

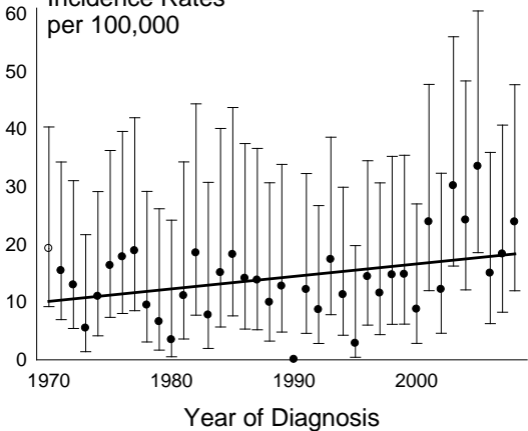

Supplement: MOESM3 [file 9641798]
